# Supplementary material
Source: Springer Nature journal article supplement (https://www.springermedizin.de/resource/supplementary/12979_2014_192_MOESM6_ESM.pdf/9603146)

**Older****Younger**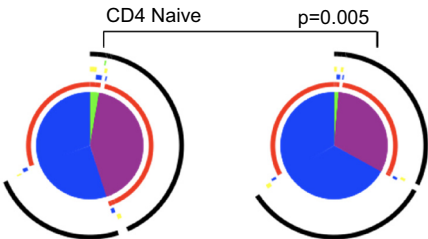**Older****Younger**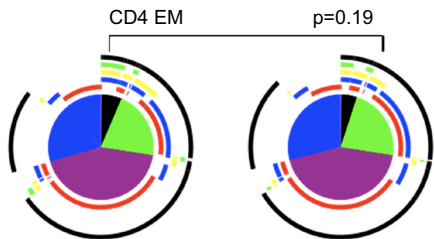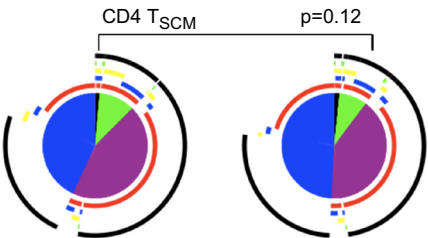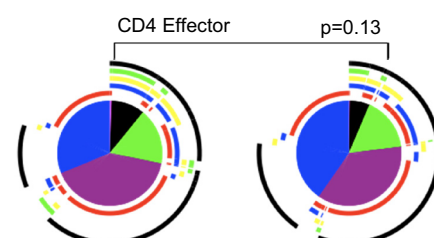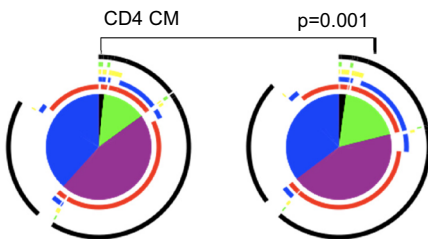

Pie chart legend  
No. of functions

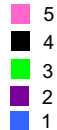

Arc legend

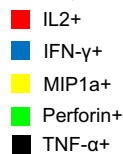

Supplement: MOESM6 [file 9603146]
